# Supplementary material
Source: PubMed Central journal article supplement (PMC3931426)

**Figure S2**

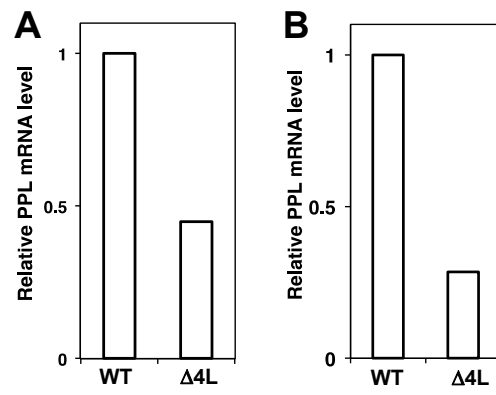

Supplement: NIHMS552127-supplement-02.pdf [file NIHMS552127-supplement-02.pdf]

**Figure S3**

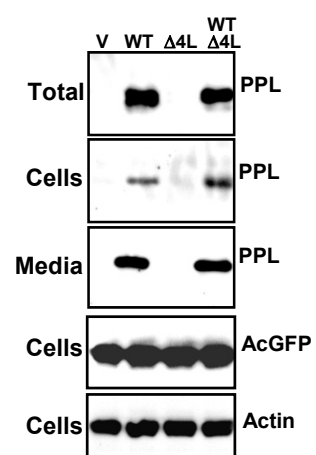

Supplement: NIHMS552127-supplement-03.pdf [file NIHMS552127-supplement-03.pdf]

**Figure S4**

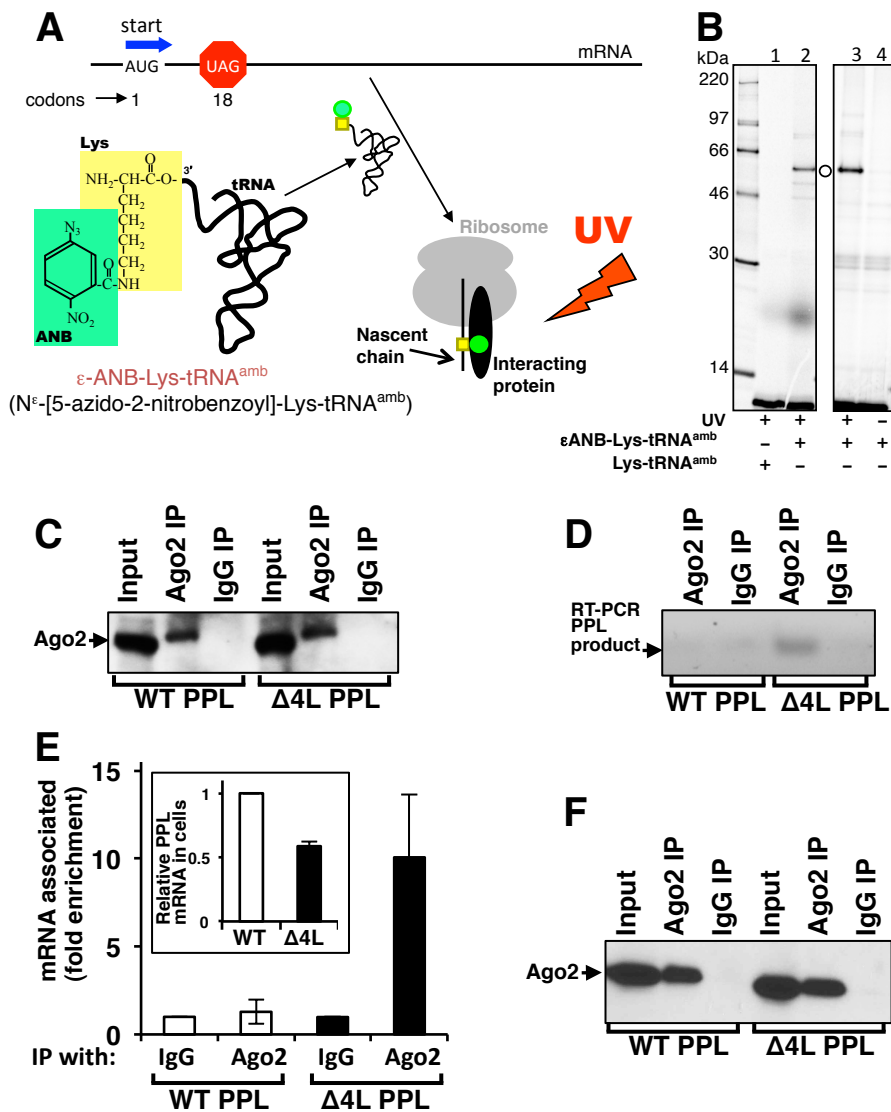

Supplement: NIHMS552127-supplement-04.pdf [file NIHMS552127-supplement-04.pdf]

**Figure S5**

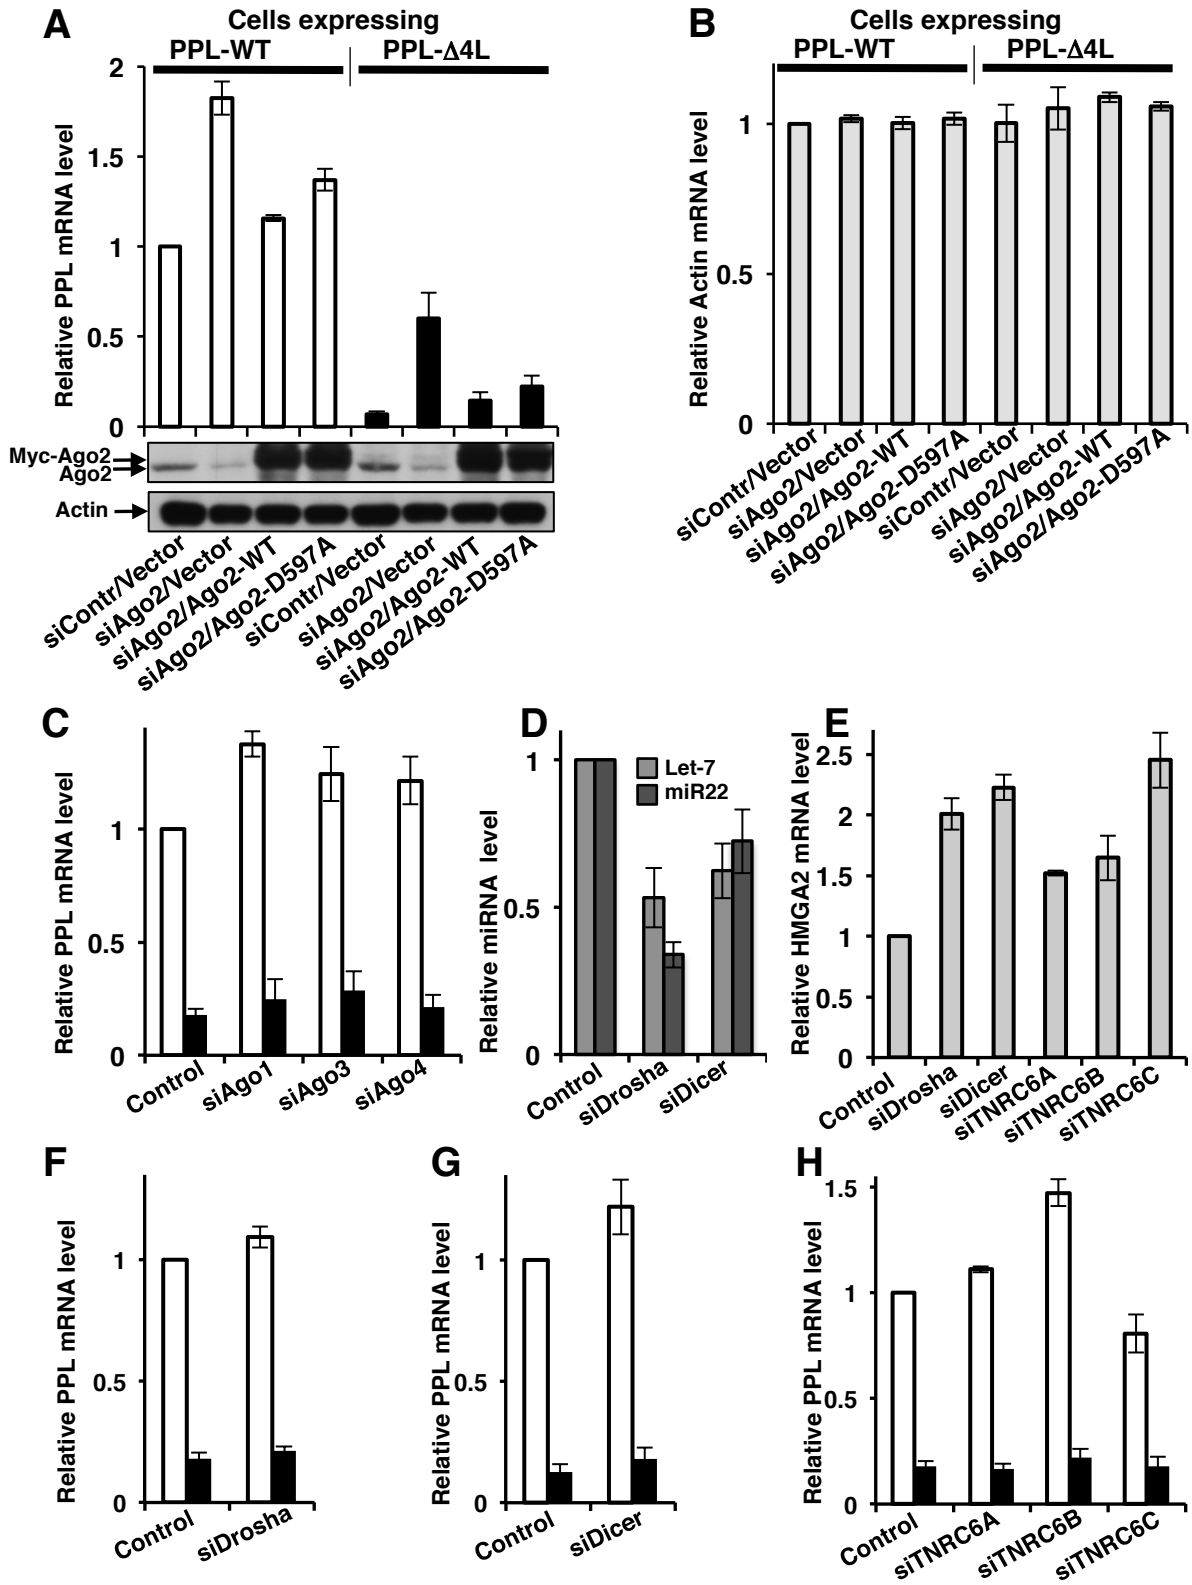

Supplement: NIHMS552127-supplement-05.pdf [file NIHMS552127-supplement-05.pdf]
